# Supplementary material for: Analyzing The Factor and Work Model of Environmental Journalistin Renewable Energy
Source: Copernicus journal article supplement (doi:10.5194/egusphere-2022-505), 2022-07-20
Supplement: Supplementary file [file egusphere-2022-505-AC7-supplement.pdf]

Deleted: sis  
Deleted:  
Deleted: t

# Analyzing The Factor and Work Model of Environmental Journalist in Renewable Energy

Marlinda Irwanti Poernomo<sup>1</sup>, Ridzki Rinanto Sigit<sup>2</sup>, Maria M. Widianari<sup>3</sup>, Fathul Qorib<sup>4</sup>

<sup>1</sup>School of Communication, Sahid University, Jakarta, 12870, Indonesia

<sup>2</sup>School of Communication, Sahid University, Jakarta, 12870, Indonesia

<sup>3</sup>Communication Science Department, University of Merdeka Madiun, Madiun, 63133, Indonesia

<sup>4</sup>Communication Science Department, Tribhuwana Tunggal University, Malang, 65144, Indonesia

Correspondence to: Marlinda Irwanti Poernomo (marlindaa1610@gmail.com)

**Abstract.** This quantitative research aimed to analyze environmental journalists' factors and work models in renewable energy. This study found that circumstance factors and the media agenda determine journalistic work. In presenting environmental topics, it is influenced by how the decision factor editors and journalists determine whether this coverage will be explored. The deadline time and the target given by the editor make in-depth environmental news coverage rarely applied by journalists on common media platforms. In environmental news coverage, technical factors such as understanding the topic, data accuracy, reliability, and confirmation statement from expert sources influence the journalists' in-depth coverage.

**Keywords:** Environmental communication, Science and media, Science communication: theory and models

## 1. Introduction

Media has a vital role as the agent in information dissemination, such as environmental issues. The media will point out the attention, persuade the opinion and assumption, influence the attitude choices choice, provide status and legitimation, define and build the realistic perception (MacQuail, 2001). It can be achieved if the media has qualified journalistic coverage. In this context, the role of journalists in media is crucial. Environmental journalism has become a critical review based on various topics and journalism scope. It occurs since apprehension and environmental problems are improved globally. Meanwhile, the Sustainable Development Goals (SDGs) as the guidelines to establish future development that still pays attention to aspects of environmental sustainability and adjustment (United Nations, 2021).

Factually, environmental journalism's scope is the same as other news products, namely a series of news making such as collecting, processing, and publishing the news information. Meanwhile, its topic focuses on many environmental issues and living environmental continuity (Abrar, 1993; Bast, 2000). Thus, environmental coverage is not getting noticed as much as

popular topics. It is considered that the media has a big impact on the public, like an economic issue, the general political and social, dominate the news. It is in line with this research, not many journalists have an understanding of environmental issues. Environmental topics will increase and develop rapidly in the future.

Based on the media coverage study, Sigit's findings stated that not all journalists in Indonesia write articles related to the environmental problem, which has become global notice. Even if there is, it is generally still in the form of a straight news or because there is news material based on a third-party press release (Sigit and Napitupulu, 2020). Meanwhile, the Sociologist Communication expert named Triyono Lukmantoro gives an overview of why environmental journalism does not get a good position in the media; he argues that environmental coverage requires particular skills and knowledge about non-human aspects such as water, air, and land. Based on an environmental perspective, all of them have low quality (Kementerian Lingkungan Hidup dan Kehutanan, 2012).

Furthermore, one of the critical environmental issues in two decades is the climate change caused by the greenhouse gas effect and fossil flue. Then, several people mention that the term climate change has changed into a climate crisis contextually (Carrington, 2019). According to this threat, the world has found an alternative way to change conventional fossil energy, which become the most significant threat of ozone depletion, the mantle layer of the earth's protective atmosphere, with renewable energy-based energy sources. It is inseparable from the fact that renewable energy sources are cleaner in releasing carbon emissions.

Nowadays, Indonesia still depends on fuel oil and coal; both are non-renewable energy (Syahni, 2018). Besides, Indonesia's annual greenhouse gas emissions were 2.4 billion tonnes of CO<sub>2</sub> equivalent (GtCO<sub>2</sub>e) in 2015, representing 4.8 percent of total global emissions (Dunne, 2019). The government has built the map of the energy fulfillment roadmap. Inside the National Energy General Plan (NEGN), it can be seen as the desired future development direction. In that document, the government supports increasing renewable energy as an essential element of the energy mix to promote a low-carbon and sustainable green economy system.

Gradually the direction of the policy began to appear. If in 2015, the contribution of renewable energy is still around 5%, it will move up. In 2025, the renewable energy mix's target will reach 23 percent; and will continue to increase to 31 percent by 2050 (DEN-RI, 2014). Nevertheless, the fact in the field is different; renewable energy projects often find stalled due to the lack of a technology ecosystem's development, human resources, and equipment spare parts that are always available. Thus, from the user's sight, the community needs time to adapt to accept to be fully receptive to this renewable energy. Thus, it is known by the public through the news made delivered by journalists. Furthermore, journalists have an essential role as the spearhead of new products. They must carry out journalistic coverage and work that demands insight and writing skills. A journalist must also have ethical and moral responsibilities for each of his journalistic activities (Fadli, 2018).

In supporting the success of their duties, the work environment formed by economic, social, political, and technology connected with the component of commercial ethics, regulation, and culture influence the journalists (Simon, 2009). Whereas in studying environmental journalism, there is a strong influence of socio-political factors and the effect of political and industrial interests (Anderson & Anderson, 2009; Boykoff & Luedecke, 2016). Thus, the factors of public interest and response will encourage the media crew such as journalists and redaction to produce more news and coverage of aspects that are increasingly attracting the attention of media readers.

In answering the research problems above, thus this research aims to (1) identify the factor which influences the journalist's work in covering the environmental news, particularly renewable energy topics, (2) mapping the journalist's position on environmental topics through four-dimensional models.

Besides, the advantage of this research is a public reference for getting, digesting, and deciding the best way for nature management and the environment in the future Sudibyo, (2014) stated that environmental journalism will encourage the public to environmental journalism as follows:

1. Gain social awareness related to the environment,
2. Help the society in obtaining adequate information to determine attitudes in environmental cases,
3. Motivate the community to act,
4. Urge the government to consider environmental information as the basis for actions and policies, and
5. Provide recommendations to the government regarding efforts to preserve and control the environment.

## **2. Research Method**

### **2.1. Data Collection and Analysis Method**

The data collected in this research used the survey method to collect respondent information through online questionnaires. This survey is exploratory to understand the problems faced by journalists in covering environmental topics. The questions made in this survey are divided into two types: the type of closed question, which provides answer choices for the respondent, and the type of open question, which provides a response based on the understanding and experience of the respondent. In this survey, there are two types of questions: the type of closed question, which provides answer choices for the respondent, and the type of open question. It provides a response based on the understanding and experience of the respondent.

The data was obtained to identify the main factors considered necessary in the proposed topic. The online questionnaire was applied because it has accessible data collection and access to information, including processing quantitative descriptive data and further analysis. Meanwhile, the question in the circumstances or a situation where there is a process of attraction and causation (Keraf, 2010). Thus, logical action is needed for justifying the logical principles.

In analyzing the position, this research will use a model approach by Stocking & Holstein, (2009) that investigate four-dimensional position of a journalist as follows:

1. Disseminator: Journalists have prominent roles as a conduit of facts directly and quickly to the public. Its task is to report accurate information through the informant. Besides, it also provides the opportunity for the public in deciding the information.
2. Investigator: Journalists as the role of the 'truth-of-fact investigator' performs functional interpretation and context. They conduct independent investigations and reject facts by scientists, the government, and the private sector without sufficient verification.
3. Mobilizer: Journalists as the role of including many large audiences, voicing concerns about one topic, pushing and setting political agendas, and acting as campaigners and messengers.
4. Adversary: Journalists as 'parties are constantly sceptical' of parties' interests, such as officials, the private sector, and scientists. They place the other party's statement as a claim that needs to be dealt with.

**2.2. Research Objective**

This research is implemented to reach around 60 media journalists who have a minimum of 2 years of work experience as a journalist. The journalists involved in this survey live in three provinces, namely East Java, West Nusa Tenggara, and South Sulawesi. They are selected as the adaptive province representative in utilizing renewable energy through indications of policies and regulations at the local government level, support for international cooperation from world development agencies (BIRU, 2021). There has been the implementation of infrastructure development in renewable energy, both initiated by the government project and or private sector.

**3. Results and Discussions**

**3.1. Quantitative Descriptive Data Result**

Based on (Table 1) showed that male dominates the respondent survey as many as 70% of females. Meanwhile, there were 40 journalists from online media filled out the questionnaires. Besides, there were 55% never cover renewable energy. Then, 58% of journalists cover renewable energy through the private initiative. Meanwhile, the journalist ever heard about renewable energy 78% of journalists' responses. Besides, as many as 98% of the journalists are interested in covering the report about the renewable energy issues.

125       **3.2. Qualitative Data Result**

In this survey, the researcher shared the open question which can be filled by the respondent: ‘What do journalists need to encourage coverage of renewable energy?’. The analysis used to adopt the model of (Stocking & Holstein, 2009) implemented through clustering of respondents' answers (Table 2).

130       Next, the respondent answer was grouped into every group (total respondent = 54 peoples) for each position showing Disseminator (33 percent), Investigator (43 percent), Mobilizer (20 percent), and Adversary (3 percent). The weight of the percentage of respondents for each group can be seen in (Figure 1).

135       **3.3. The Factor of Journalist Work in covering Renewable Energy**

The news topic of living environment is not the regular topic covered by media journalists working in the mainstream media. It shows that the result of the respondent's answer which is not covering the environmental report, specifically renewable energy. The researcher argues that the value of journalists’ news, insight, and background taking part and factor that encourages coverage to become an environment where journalists do not widely work. Nevertheless, based on the survey answered by the respondent, the initiative and motivation of personal journalists also become a more important push for environmental topics to become media news. This survey shows that more than half of respondent which answered said that making news on environmental topics was based on the journalists’ wishes, more than the assignment of editors.

140       From the observations made on articles produced by journalists, the researchers found that the straight news writing style is the news choice. It seems to have reporting targets and assignments given by the editor to journalists, including attending press conferences or invitations for coverage from other parties. The news of events in the form of a short report, timely and focused on what happened demanded from the media where journalists work to fill out daily news reports. With the mandatory number and deadline for writing several incident news reports, which are usually used as an assessment of the work performance of journalists in the media, the time for exploration of journalists to explore specific issues is limited.

145       Through depth-interview with several media journalists in this research, it was found that the main obstacle to environmental coverage felt by journalists was the limited number of sources and references in the coverage plan. The story which is constructed by the journalist determined by the discourse that is formed, including the network by the journalist with the interviewee (Lau, 2012). Journalists who have contact sources, backgrounds, or work in institutions dealing with renewable energy, will usually have a lot of material and complete stories. Relationships that are built with government agencies, local governments, academics/lecturers, and non-governmental organizations (NGOs), thus become a necessity.

150       This problem is the interviewee as the source which can be cited by a journalist at a limited area level. Thus, the journalist becomes difficult to implement further analysis in the story or implement the confirmation about an event that occurs. Sometimes when encountering, job security despite having competence and authority, government or local government

Deleted: <#>Discussion¶

officials are not willing to provide an explanation when asked. Thus, based on 98 percent of journalist respondents mentioned that they do not know about the renewable energy (EBT) policy made by the government or local government. In this condition, the renewable energy topic does not become knowledge and discourses at the public level. It also encourages that existing stakeholders have not put in place an agenda to create and invite journalists to be involved in disseminating this topic.

A similar phenomenon is found in various implementation initiatives at the community level. As change agents, there are not many stories that NGOs or other activists can offer for journalists to pick up. Based on the survey, 98 percent of journalist respondents said they did not know until they only knew vaguely about conditions and realities on the ground on the topic of renewable energy. In fact, there are many kinds of coverage that can be raised and have the potential to have high news value.

In this survey, it found high internal motivation from journalists, where 98 percent of respondents stated interested to know renewable energy topic and 90 percent stated willing to attend workshops or training on this theme to learn the systematic topics in this issue more systematically. It must be appreciated realizing the environmental subject such as the theme of sustainable development and in particular, the topic of sustainable energy covers broad issues involving economic, social, cultural, and scientific dimensions of science that need to be studied comprehensively in story elements.

Further, the selection and special interests as above have to do with the background or experience they have. A journalist who has the proximity factor with the theme, whether driven by location, issue, or background factor (such as educational background, having joined as an environmentalist/personal hobby, spirit of activism, and advocacy) will encourage material exploration and more complete news coverage. It is related to how the content of renewable energy should be created; the survey shows that this theme should be presented with more data and information on field conditions (investigation and fact disclosure). Journalists it is needed to implement observation and research, extract information, conduct analysis, and make in-depth coverage. It is not just getting information from a third party, thus the basis of problem (if there is an impact) and the fact of the benefits become an important object to investigate.

On the other hand, the respondent argues that the journalist's role is important as a dissemination agent. Information about the important thing related to renewable energy must continue to be reported to the public and the stakeholders. The journalist has a role as the socialization actor, giver of understanding, and center of knowledge of important information (Patterson & Donsbagh, (1996).

Meanwhile, the minor result from this survey, depict the opinion that journalist will have an important role in the driving and mobilization of discourse. Such as innovative actions and solutions that exist at the level of actors (government, private sector, and grass-roots). Journalists can be a moderating role in networking among stakeholders involved in the development of renewable energy. In a narrower choice of roles, this survey shows the role of journalists as opponents of counter policies

for practices that are not environmentally friendly and have the potential to threaten the future of people's lives. Journalists through their writings and analysis can act in a position of argumentative opposition.

It is also supported by data delivery and results in analysis which is presented as counter-discourse. As part of news ethics, data objectivity, instead of information and data manipulation, in the context of reporting that is advocating is necessary compared with PALEN (1999). The researchers argue that in this context, the adversary position is medium. Meanwhile, realizing the existence of the topic related the renewable energy is not a controversial topic, otherwise, it should be encouraged. It is in line with the respondent's answer of the importance of journalists in the role of disseminator.

#### **3.4. Journalist Position Mapping in Environmental Topic (Renewable Energy) by Four-Dimensional Model**

This research aims a new relational continuum in the axis of social practice (public outreach-field research) and the ordinal axis which represents the social transformation (praxis-discourse) compare with Roderick, (2018). For model, this quadrant is added to the four-dimensional positions of journalists offered by Stocking and Holstein (2009).

In addition, the researchers add an exploratory narrative space (note the axis of the quadrant). The journalists do not only act as 'messengers' through quotes obtained from sources, which are written into the news. Furthermore, through reflective narratives and discourse searches, journalists become transformative change agents. In this concept, the journalist's role as the opening perspective and thinking can be explored through communities formed by environmental journalists independently, workshops facilitated by training associations, media, and institutions that have concerns and interest in raising this issue. In addition, there are the groups of civil society organizations, observers, communities, and NGOs who care about this theme, a more in-depth search can also be carried out.

The deepening of the topic will ultimately provide reporting objectivity. By understanding the issues at hand, journalists can integrate and build storylines on the data, observation of facts, and the results of interviews they collect. In terms of activity (see ordinate in the quadrant), we argue that journalists have a scope of work that only discloses, but extends from investigating problems (fieldwork), to the ability to present and express issues in public (outreach work).

In this model, the 'cum' journalist-activist will spend more time in the 'investigator' and 'mobilizer' positions. In investigating necessary facts, which will ultimately be conveyed to the public by media. On more collaborative themes, the researchers argue journalists and editors can also choose the adversary position. It can be proven by a review of literature from Giannoulis and Botetzagiaz who stated that environmental journalism mostly covers various complex problems related to economic politics which causes the environmental problem. Previously, environment journalism only raises traditional issues involving conservation. Nowadays, it turns into more contemporary issues related to pollution, environmental destruction, human health, and living creatures that live on earth (Giannoulis et al., 2010).

#### 4. Conclusion

Based on the explanations above, it can be concluded that journalist work is determined by environmental factors and media agendas. Meanwhile, the presentation of environmental topics is influenced by how the trust factor in the news values. Then, the coverage will be explored by journalists. Besides, in the work of covering environmental news, in-depth journalistic analysts are influenced by technical factors such as understanding of the topic, accuracy and reliability of data, and confirmation from expert sources. In addition, mapping the journalist position, through the concept of existing theoretical models finds that journalists can move dynamically as investigators, disseminators, mobilizers, and adversaries. This model can be compared with the quadrant in the basic premise development. It is related to social practice and social transformation described in the model as axis and ordinates. Thus, the researchers suggest that this model will be developed in the future studies.

#### Declaration of interests

The authors declare that they have no conflict of interest.

#### Acknowledgments

The authors would like to say thanks to the university and other parties who supported this research.

#### References

- Abrar, A. N. (1993). *Mengenal Jurnalisme Lingkungan Hidup*. Gajah Mada University Press.
- Anderson, D. R., & Anderson, K. E. (2009). Sustainability Risk Management. *Risk Management and Insurance Review*, 12(1), 25–38. <https://doi.org/10.1111/j.1540-6296.2009.01152.x>
- Bast, J. L. (2000). *Environmental Journalism: A Little Knowledge is Dangerous*. The Heartland Institute.
- BIRU. (2021). Program TERANG Hivos, Bentuk Dukungan Realisasi 23% Energi Terbarukan. Biogas Rumah.
- Boykoff, M., & Luedecke, G. (2016). Elite News Coverage of Climate Change. In *Oxford Research Encyclopedia of Climate Science*. Oxford University Press. <https://doi.org/10.1093/acrefore/9780190228620.013.357>
- DEN-RI. (2014). *Laporan Dewan Energi Nasional Republik Indonesia (DEN-RI) 2009 - 2014*. Dewan Energi Nasional Republik Indonesia.
- Carrington, D. (2019, May). Why the Guardian is Changing The Language it uses about The Environment. *The Guardian*.
- Dunne, D. (2019). *Profil Carbon Brief: Indonesia*. Carbon Brief.



Fadli, A. (2018). ETIKA DAN TANGGUNG JAWAB JURNALIS (STUDI PEMBERITAAN HOAX MELALUI MEDIA ONLINE DI KOTA MAKASSAR). *Jurnal Jurnalisa*, 4(2). <https://doi.org/10.24252/jurnalisa.v4i2.6893>

245 Giannoulis, C., Botetzagias, I., & Skanavis, C. (2010). Newspaper Reporters' Priorities and Beliefs About Environmental Journalism: An Application of Q-Methodology. *Science Communication*, 32(4), 425–466. <https://doi.org/10.1177/1075547010364927>

Kementerian Lingkungan Hidup dan Kehutanan. (2012). *Membangkitkan Jurnalisme Lingkungan*. Direktorat Jenderal Pengendalian Perubahan Iklim.

250 Keraf, A. S. (2010). *Etika Lingkungan Hidup*. Penerbit Buku Kompas.

Lau, R. W. (2012). Re-theorizing news' construction of reality: A realist-discourse-theoretic approach. *Journalism*, 13(7), 886–902. <https://doi.org/10.1177/1464884911432660>

MacQuail, D. (2001). *McQuail's Mass Communication Theory*. Sage Publications.

PALEN, J. A. (1999). Objectivity as Independence. *Science Communication*, 21(2), 156–171. <https://doi.org/10.1177/1075547099021002004>

255 Patterson, T. E., & Donsbagh, W. (1996). News Decisions: Journalists as Partisan Actors. *Political Communication*, 13(4), 455–468. <https://doi.org/10.1080/10584609.1996.9963131>

Roderick, I. (2018). Multimodal Critical Discourse Analysis as Ethical Praxis. *Critical Discourse Studies*, 15(2), 154–168. <https://doi.org/10.1080/17405904.2017.1418401>

260 Sigit, R. ., & Napitupulu, F. (2020). Analisis Isi Media Dalam Isu Konservasi Spesies Laut di Indonesia (Studi Liputan Media Daring Untuk Hiu Dan Pari Manta). In FIKOM.

Simon, C. (2009). The Consultation. *InnovAiT: Education and Inspiration for General Practice*, 2(2), 113–121. <https://doi.org/10.1093/innovait/inn186>

Stocking, S. H., & Holstein, L. W. (2009). Manufacturing Doubt: Journalists' Roles and The Construction of Ignorance in a Scientific Controversy. *Public Understanding of Science*, 18(1), 23–42. <https://doi.org/10.1177/0963662507079373>

265 Sudibyo, A. (2014). *Strategi Media Relations*. Gramedia.

Syahni, D. (2018). *Catatan Akhir Tahun: Andalkan Batubara, Transisi ke Energi Bersih Lamban*. Mongabay.

United Nations. (2021). *Take Action for the Sustainable Development Goals*. United Nations Sustainable Development.

270

275

280    **Table 1. Result of Respondent's Answer**

| Statements                                                                         | Criteria                                                                 | Amount | Frequency (%) |
|------------------------------------------------------------------------------------|--------------------------------------------------------------------------|--------|---------------|
| Gender                                                                             | Male                                                                     | 38     | 70%           |
|                                                                                    | Female                                                                   | 18     | 30%           |
| Classified Journalist                                                              | Print media                                                              | 6      | 11,1%         |
|                                                                                    | Television media                                                         | 1      | 1,9%          |
|                                                                                    | Radio                                                                    | 7      | 13%           |
|                                                                                    | Online                                                                   | 40     | 74%           |
| Observed Data                                                                      | Never Covering Environment (Renewable Energy)                            | 30     | 55%           |
|                                                                                    | At Least Once Cover Environment (Renewable Energy)                       | 24     | 45%           |
|                                                                                    | Personal Initiative                                                      | 14     | 58%           |
| At Least Once Cover Environment (Renewable Energy)                                 | Editor's Assignment                                                      | 9      | 38%           |
|                                                                                    | Energy-Company Invitation                                                | 1      | 4%            |
| The Journalist's Understanding about Government Policy related to Renewable Energy | Never heard                                                              | 11     | 20%           |
|                                                                                    | Heard but vaguely                                                        | 42     | 78%           |
|                                                                                    | Know it in detail                                                        | 1      | 2%            |
| Interest in Covering Renewable Energy                                              | Interest                                                                 | 53     | 98%           |
|                                                                                    | Not Interest                                                             | 1      | 2%            |
| The Journalist's Reason in Covering Renewable Energy                               | Interest if there were training or workshops related to renewable energy | 49     | 90%           |
|                                                                                    | Not Interest                                                             | 5      | 10%           |

310

Table 2. Result of Respondent Answer

| No | Position     | Submitted Keywords                                                                                                                                                     |
|----|--------------|------------------------------------------------------------------------------------------------------------------------------------------------------------------------|
| 1  | Disseminator | Information giver, public education agent, agent of socialization practice, promotor of advantages and benefits                                                        |
| 2  | Investigator | Root cause finder, observer & field study actor, data analyzer, in-depth coverage & investigation actor, information digger from key stakeholders, benefit fact finder |
| 3  | Mobilizer    | Driving discourse on innovation and solution action, becoming a network actor & moderator                                                                              |
| 4  | Adversery    | Opponents of counter policies, argumentative opposition actors                                                                                                         |

320

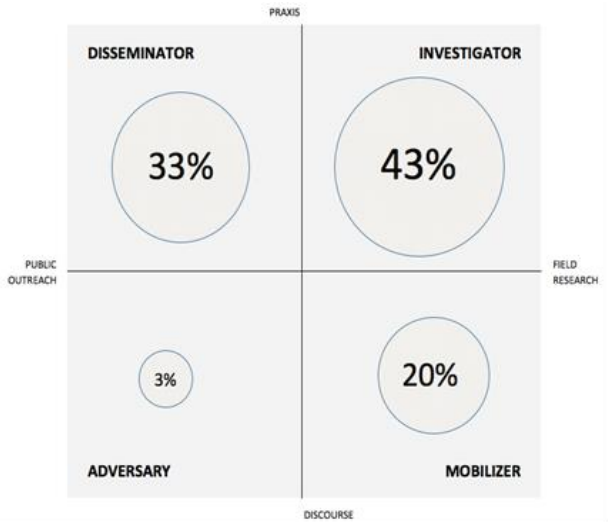

325

330

335

Figure 1. Journalist Position Quadrant (Percent) Based on Respondents' Answers
